# Supplementary material for: Transcriptome profiling of the dynamic life cycle of the scypohozoan jellyfish Aurelia aurita
Source: PubMed Central journal article supplement (PMC4334923; doi:10.1186/s12864-015-1320-z), 2015-02-14
Supplement: 12864_2015_1320_MOESM2_ESM.pdf [file 12864_2015_1320_MOESM2_ESM.pdf]

# Statistics of the completeness of the genome based on 248 CEGs #

|          | #Prots | %Completeness | - | #Total | Average | %Ortho |
|----------|--------|---------------|---|--------|---------|--------|
| Complete | 228    | 91.94         | - | 619    | 2.71    | 71.05  |
| Group 1  | 57     | 86.36         | - | 161    | 2.82    | 73.68  |
| Group 2  | 54     | 96.43         | - | 151    | 2.80    | 79.63  |
| Group 3  | 55     | 90.16         | - | 145    | 2.64    | 65.45  |
| Group 4  | 62     | 95.38         | - | 162    | 2.61    | 66.13  |
| Partial  | 235    | 94.76         | - | 714    | 3.04    | 77.02  |
| Group 1  | 60     | 90.91         | - | 177    | 2.95    | 75.00  |
| Group 2  | 54     | 96.43         | - | 178    | 3.30    | 88.89  |
| Group 3  | 58     | 95.08         | - | 171    | 2.95    | 72.41  |
| Group 4  | 63     | 96.92         | - | 188    | 2.98    | 73.02  |

# These results are based on the set of genes selected by Genis Parra #

# Key: #  
# Prots = number of 248 ultra-conserved CEGs present in genome #  
# %Completeness = percentage of 248 ultra-conserved CEGs present #  
# Total = total number of CEGs present including putative orthologs #  
# Average = average number of orthologs per CEG #  
# %Ortho = percentage of detected CEGs that have more than 1 ortholog #

# Listing missing proteins in each category

# Category: Complete

KOG0018, KOG0025, KOG0271, KOG0285, KOG0292, KOG0357, KOG0363, KOG0434,  
KOG0563, KOG1211, KOG1241, KOG1942, KOG2311, KOG2606, KOG2623, KOG2638  
KOG2707, KOG2785, KOG2967, KOG3405

# Category: Partial

KOG0025, KOG0292, KOG0357, KOG0434, KOG0563, KOG1211, KOG1241, KOG1942  
KOG2311, KOG2606, KOG2623, KOG2707, KOG3405
