# Supplementary material for: Transcriptome profiling of the dynamic life cycle of the scypohozoan jellyfish Aurelia aurita
Source: PubMed Central journal article supplement (PMC4334923; doi:10.1186/s12864-015-1320-z), 2015-02-14
Supplement: 12864_2015_1320_MOESM9_ESM.pdf [file 12864_2015_1320_MOESM9_ESM.pdf]

RedSea CL390 MKTLSILLLIVLSVVLCAATREAVEETAKDALRPAEDTIQPVETDSYEPEEDQAESEEEP 60  
Roscoff CL390 MKVLSILILIGLSVFSCAATKDAEEKITKDAIRTAGDTIEPVESDSDEPEQDQESEEEP 60  
\*\* .\*\*\*\*\*:\*\* \*\* . \*\*\*\*\*: \* \* : \*\*\*\*\*: \* \* \*\*\*\*\*:\*\* \*\*\*\*\*

RedSea CL390 TEAESTNDDQDEENSAGTIKVSSDSFFWRRRRRSTRRRRCYFARRRYFARRRYIARRRYTA 120  
Roscoff CL390 NEAESTSDDQDEESSA-TTEASSDPIFWRRR--STRRRCYARRRYIARRRYIARRRCYR 117  
.\*\*\*\*\*.\*\*\*\*\*. \*\* \* : .\*\*\*. :\*\*\*\*\* \*\*\*\*\*:\*\*\*\*\*:\*\*\*\*\*

RedSea CL390 RRGPIAHHRRRGVILLRRRSSLRRRSSLRRRSGRRRSSVRITIR-WSSRRRG 173  
Roscoff CL390 RR---SFRRR---LSFRRRWSRRR---WLRRRFYRRRWSRRRSLRRRFSFRRRG 163  
\*\* :.\*\*\* : :\*\*\* \* \*\* \*\*\*\*\* . \*\*\* \* \* : \* :\* \*\*\*\*\*
