# Supplementary material for: Transcriptome profiling of the dynamic life cycle of the scypohozoan jellyfish Aurelia aurita
Source: PubMed Central journal article supplement (PMC4334923; doi:10.1186/s12864-015-1320-z), 2015-02-14

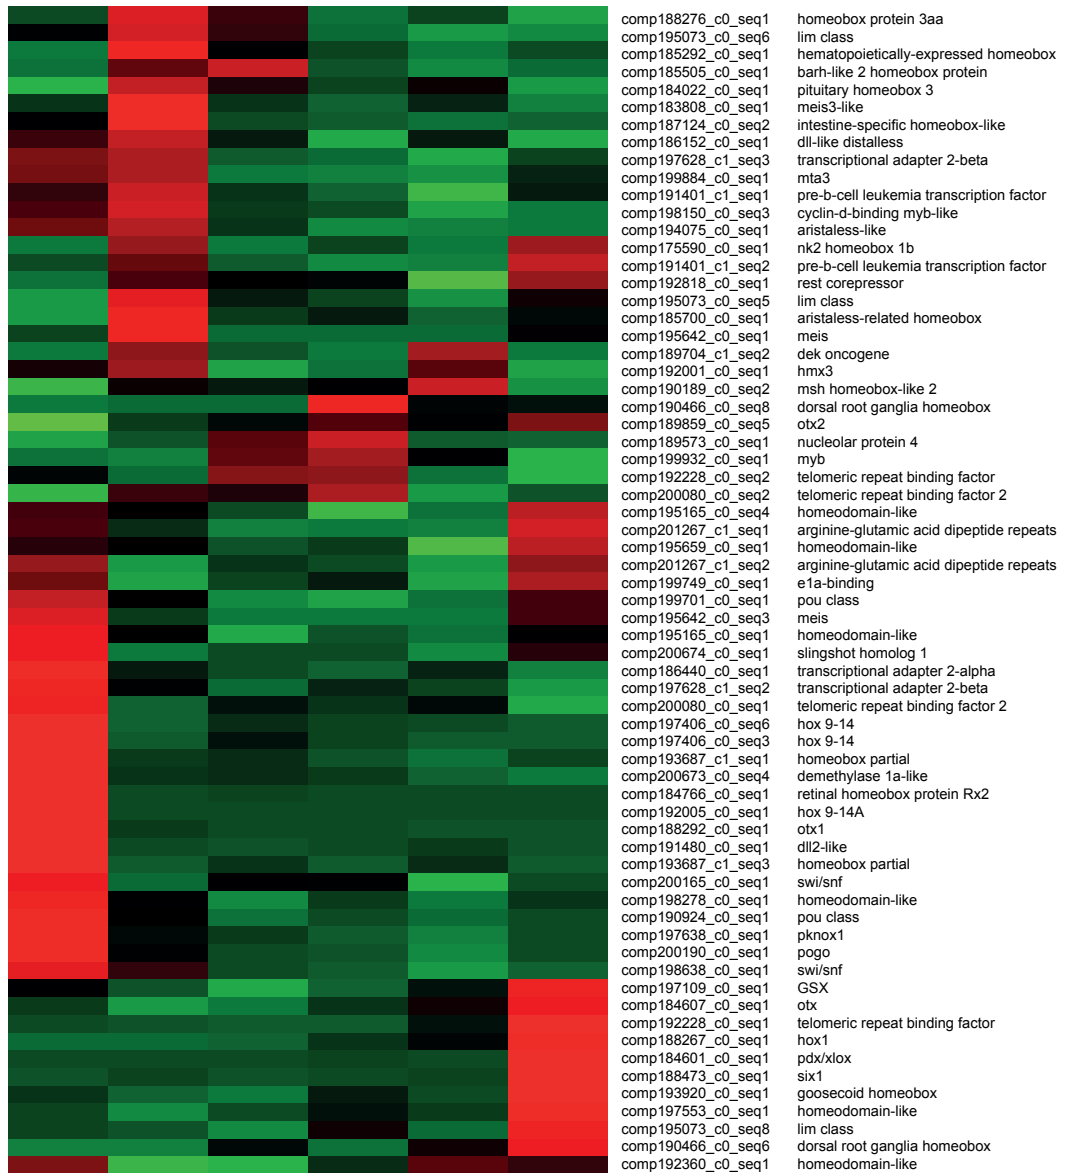

Planula  
Polyp  
Early strobila  
Advanced strobila  
Ephyra  
Medusa

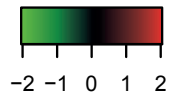

Supplement: 12864_2015_1320_MOESM11_ESM.pdf [file 12864_2015_1320_MOESM11_ESM.pdf]
